# Supplementary material for: Evaluation of synthetic formaldehyde and methanol assimilation pathways in Yarrowia lipolytica
Source: Fungal Biol Biotechnol. 2019 Dec 17;6:27. doi: 10.1186/s40694-019-0090-9 (PMC6918578; doi:10.1186/s40694-019-0090-9)
Supplement: Supplementary file 4 — Additional file 4: Table S1. Sequences of synthetic gene fragments and those of PCR oligos for amplification of promoters, terminators and ARS. [file 40694_2019_90_MOESM4_ESM.xlsx]

## Sheet: Fragments
Sequence name	Sequence
CbDhas	ATGGCCCTCGCCAAGGCCGCCTCTATCAACGACGACATCCACGACCTCACCATGCGAGCCTTCCGATGCTACGTGCTCGACCTCGTCGAGCAGTACGAGGGCGGCCACCCCGGCTCTGCTATGGGCATGGTGGCTATGGGAATCGCCCTCTGGAAGTACACCATGAAGTACTCTACCAACGACCCCACCTGGTTCAACCGAGACAGATTCGTGCTCTCTAACGGCCACGTGTGCCTCTTCCAGTACCTCTTTCAGCACCTCTCTGGCCTCAAGTCTATGACCGAGAAGCAGCTCAAGTCTTACCACTCTTCTGACTACCACTCTAAGTGTCCCGGCCACCCCGAGATCGAGAACGAGGCCGTCGAGGTGACCACCGGACCCCTCGGCCAGGGCATCTCT…
BmHps	ATGGAGCTGCAGCTGGCCCTGGACCTGGTGAACATCGAAGAAGCCAAGCAGGTCGTCGCCGAGGTGCAGGAATACGTTGACATCGTCGAGATCGGCACCCCCGTGATCAAGATTTGGGGACTGCAGGCCGTGAAGGCCGTCAAGGACGCATTCCCCCACCTCCAGGTGCTGGCCGACATGAAGACCATGGACGCCGCTGCCTACGAGGTGGCTAAGGCCGCCGAGCACGGAGCCGACATCGTGACCATCCTGGCCGCTGCCGAGGACGTGTCTATCAAGGGCGCCGTCGAAGAGGCTAAGAAGCTGGGCAAGAAGATCCTGGTGGACATGATCGCCGTGAAGAACCTGGAGGAACGAGCCAAGCAGGTTGACGAGATGGGCGTGGACTACATCTGCGTC…
BmHps_native	ATGGAACTTCAATTAGCTCTAGATTTGGTAAACATTGAAGAAGCAAAACAAGTAGTAGCTGAGGTTCAGGAGTATGTCGATATCGTAGAAATCGGTACTCCGGTTATTAAAATTTGGGGTCTTCAAGCTGTAAAAGCAGTTAAAGACGCATTCCCTCATTTACAAGTTTTAGCTGACATGAAAACTATGGATGCTGCAGCATATGAAGTTGCGAAAGCAGCTGAGCATGGCGCTGATATCGTAACAATTCTTGCAGCAGCTGAAGATGTATCAATTAAAGGTGCTGTAGAAGAAGCGAAAAAACTTGGCAAAAAAATCCTTGTTGACATGATCGCAGTTAAAAATTTAGAAGAGCGTGCAAAACAAGTGGATGAAATGGGCGTAGACTACATTTGCGTG…
BmHps_Sc	ATGGAGCTACAACTGGCACTGGACCTAGTCAACATAGAGGAGGCAAAACAAGTAGTCGCCGAAGTTCAAGAATATGTGGACATTGTGGAAATCGGTACTCCAGTAATTAAAATCTGGGGGCTACAAGCGGTAAAAGCAGTCAAGGACGCATTCCCACATCTGCAAGTCCTAGCCGATATGAAGACGATGGATGCCGCCGCATACGAAGTTGCAAAAGCCGCAGAACATGGTGCAGACATCGTAACTATACTTGCCGCCGCTGAAGACGTTAGCATAAAGGGTGCTGTAGAGGAGGCTAAAAAGCTTGGAAAAAAGATACTTGTAGACATGATTGCTGTAAAAAATCTGGAAGAAAGGGCGAAGCAGGTGGACGAAATGGGCGTAGATTATATATGTGTT…
BmPhi	ATGATCTCGATGCTGACCACCGAGTTTCTGGCCGAGATCGTGAAGGAGCTGAACTCTTCTGTCAACCAGATCGCCGACGAGGAGGCCGAGGCCCTGGTCAACGGCATCCTGCAGTCTAAGAAGGTGTTCGTCGCTGGCGCCGGACGATCTGGCTTCATGGCCAAGTCTTTCGCCATGCGAATGATGCACATGGGCATCGACGCCTACGTGGTGGGCGAGACTGTGACCCCCAACTACGAGAAGGAGGACATCCTGATCATCGGCTCTGGCTCTGGCGAGACTAAGTCTCTGGTGTCTATGGCCCAGAAGGCCAAGTCTATCGGCGGCACCATTGCCGCCGTGACCATCAACCCCGAGTCTACCATCGGACAGCTGGCCGACATTGTGATCAAGATGCCC…
BmPhi_Sc	ATGATTTCTATGCTAACTACGGAGTTTCTTGCTGAAATAGTTAAGGAGCTAAACAGCAGCGTAAACCAAATTGCGGATGAAGAGGCGGAAGCCTTGGTCAATGGAATCTTGCAGTCTAAGAAAGTCTTTGTCGCTGGAGCGGGCAGGTCAGGCTTCATGGCAAAATCTTTTGCTATGAGAATGATGCACATGGGTATTGACGCATACGTAGTGGGCGAGACTGTGACACCCAACTACGAAAAAGAGGATATCTTAATAATTGGTAGCGGAAGCGGTGAAACGAAAAGCCTAGTGTCTATGGCGCAGAAGGCGAAATCTATTGGCGGAACGATTGCAGCTGTTACCATTAACCCAGAGAGTACCATAGGACAACTTGCGGATATCGTTATCAAGATGCCT…
MgHpsPhi	ATGAAGCTGCAGGTCGCCATCGACCTGCTGTCTACCGAGGCCGCCCTGGAACTGGCCGGCAAGGTGGCCGAGTACGTGGACATCATCGAGCTGGGCACCCCCCTGATCGAGGCCGAGGGCCTGTCTGTGATCACCGCCGTGAAGAAGGCCCACCCCGACAAGATCGTGTTCGCCGACATGAAGACCATGGACGCCGGCGAGCTGGAAGCCGACATTGCCTTCAAGGCTGGCGCCGACCTGGTGACCGTGCTGGGCTCTGCCGACGACTCTACCATTGCCGGCGCTGTGAAGGCCGCCCAGGCCCACAACAAGGGCGTGGTGGTGGACCTGATCGGCATCGAGGACAAGGCCACCCGAGCCCAGGAAGTGCGAGCCCTGGGCGCCAAGTTCGTCGAGATG…
BgHps	ATGAAAATCCAACTCGCACTCGATCGACTGACAATTAGTGATGCTATTAGATTGACAGAGCAGGTGAGAGATTACGTCGACTGGATTGAGGTCGGAACCTCTCTGATAAAGGAATTTGGCGTTGCGTCGATTAAGGCAATGAAAGAGGCTTTCCCCGAGAAGGTGATCGTGGCCGACTGTAAAACGATCGACAATGCCAAGTATGAGTTTGAGATGTGTTATGAGGCCGGGGCCGACATCGCCACTGTCATGGGCGTTAGCCCTGCCGCCACCCTGCAGACTTGCGAGGCCACCGCCAAGAAGTATGAGAAGCAGATGATGATTGACCTGTTAAATGTGTCCGAGGAACGAAAGAAGTCTTTGCTGATTTACCAGAACGCTATCTTCTGCGATCATGTG…
BpHps	ATGGAGCTGCAGCTGGCTTTGGACCTGGTGAACATTGAGGAGGCCAAGGAGATTGTGGCAGAAGTTGCCGAGTTTATCGACATCGTGGAAATTGGCACCCCTGTTGTCATCAATGAAGGCTTGAGGGCCGTGAAGGAAATGAAAACCGCCTTCCCCTCCCTTAAGGTGCTGGCTGACCTCAAGGTGATGGACGCTGGGGGTTACGAAGTCATGAAAGCTTCAGAGGCGGGAGCCGATATTGTGACGATCCTTGGTGCGACGGATGATGCCACCATTACCGGCGCTGTCGAGGAAGCTAAGAAGCATGGCTCGAAGATCCTGATCGACATGATCAACGTGAAGGACATCGCTCAGAGAGCCCAGGAGATCGACGCTCTGGGTGTAGATTACATTTGCGTC…
BsHps	ATGGAGCTGCAGCTCGCTCTGGACTTGGTGAACATCCCGGAAGCTATCGAGCTTGTGAAGGAGGTCGAACAATACATTGATGTGGTGGAGATCGGCACTCCAGTGGTAATTAACGAGGGTTTGAGAGCAGTTAAAGAGATCAAGGAAGCCTTTCCTCAGCTTAAGGTTCTCGCTGACCTTAAGATCATGGACGCCGGTGGCTACGAGATAATGAAGGCATCGGAGGCAGGAGCCGACATAATCACCGTTCTGGGAGCCACAGATGACGCCACCATTAAGGGAGCTGTGGAAGAGGCCAAGAAGCAGAAAAAGAAAATCCTCGTGGATATGATCAACGTCAAGGACATTGAGTCCCGCGCTAAAGAGATCGATGCCCTGGGTGTCGACTACATATGTGTG…
HmHps	ATGAAGTTGCAGATTGCCATTGATCTCACAGAAATGGGAAAGGCTTTGTGCCTAGCAGAGAAGGTGAAGGACATCGTCGACATCGTCGAGATTGGCACTCCTTTGATTATCAAGGAGGGTATGCACCCCGTGCGAGCACTGAAGTCCAAGTTTCCCGGCCTGTGTGTTCTCGCTGATACAAAGATTATGGATGGCGGTGCCATTGAGTGTCATGACGCATGCGAGGCCGGAGCCGACATTGTCACCGTGCTGGCTCTGGCAGACCAAGCGACTATTACTGAGGTCGTCAAGACAGCCCACGCAGTGGGAAAGCAGGTCCTGGCCGACCTGATCGGTGTCGATGACCTCGCTGCAAAAGCTCAGCTTTGTCTGACCCTCGGTGTGGATCTGATAGGTGTC…
LeeHps	ATGACGAAGCTGCAGGTGGCGATTGACCTGCTGAGTACAAAGGAGGCTCTGGCTCTGGCCGAGAAGGTCGCTCCCTACGTCGACATTATTGAGCTCGGTACACCTTTGATCAAATCCGAGGGTGTTTCCGTGATCCGTGCAATGAAGGACGCATTCCCGGATAAGCAGGTTTTTGCTGACTTCAAGACTGCCGACACCGGAGAACTCGAAGCCGGCCTTGCTTTTGACGCTGGTGCTGACTTCGTGACTATCCTTGGTTCTGTCGATGATGCGACAATAAAGGGCGCCGTCAAAGCCGCAAACGAGCGAAACAAGGGAGTCGTGGTGGACACTATCGGCGTCAAGGACCGAGTGAAACGGGCGAAAGAGGTGAGCGAGTTCGGTGTTAAATTTGTCGAG…
LbHps	ATGAAGAAGCTTCACGTTGCACTCGATCTGGAGACAATTGCCCAGGCCGAGAAGGTACTGGCTGAGGTGGGACCCTACGTGGACATCATTGAGATCGGAACCCCCCTCATGATCTCGGAGGGCGCCCAGGCGGTGAAGGAGATTAAAGATTTGTATCCCGACAAGGAAGTCTTCGCGGATATTAAGATCATGGACGGCGGTCAGCCGATGTCTGACGTTGCCTTTAAGGCTGGAGCTGATATGGTTTCCGTCTTAGGTGCCTCCGAGGACGCAACGATTAAGGAGGTGATAGAGAACGCGAAGAAGTACAACGGCAAGGTACTTGTCGACATGTGCAGCGTGAAAAACATCGCCGAGAGAGCTAAAACAGTTGACGAGTGGGGACCTGACTACATCTGT…
MaHps	ATGGCCCTAACCCAGATGGCCCTGGATTCCCTCGACTTCGATGCTACTGTGGCGTTAGCCGAAAAGGTGGCGCCTCATGTCGACATCCTGGAGATCGGCACCCCCTGTATCAAACATAACGGCATCAAGCTTCTGGAAACTCTCCGAGCTAAGTTCCCTAACAACAAGATCCTTGTTGATTTGAAGACTATGGATGCCGGGTTCTACGAAGCCGAACCCTTCTACAAGGCCGGCGCAGATATCACAACGGTTCTCGGCGTCGCTGACCTCGGAACGATTAAGGGCGTCATTGACGCTGCGAACAAGTATGGCAAGAAGGCCCAGATCGACCTGATCAATGTGGGAGACAAGGCTGCGCGCACCAAGGAAGTGGCTAAGTTGGGCGCTCATATCATCGGC…
MvHps	ATGGCCACCCCCCTTATCCAGATGGCCCTGGACAGTCTTGACTTCGACGCCACGGTCGCTCTTGCCGAGCAAGTGGCCCCATACGTCGACATCTTCGAGATTGGCACACCATGCATCAAGTACAACGGCTTGAAGCTTGTCGAAGAACTGCGAGCCCGATTTCCCAATCAGCTTATCTTGGTTGACTTGAAGACAATGGACGCCGGCGAATACGAAGCGACTCCTTTCTACGCCGCAGGAGCCGATATTTGCACCGTCCTGGGTGTGTCCGGTATGGCAACTATCGGCGGCGTCATTAAGGCCGCGAAAGCCCATAACGCTGAGGTGCAGATTGACTTGATTAATGTCCCGAACAAGGCAGAGTGCGCCCGCGAGGCCGCAGCCCTGGGAGCCCAAATC…
RtHps	ATGAAGTTGCAGCTCGCACTGGACGAGTTGCCCCTGGCAGAGGCCCTCGCTTTGGCCGAGAAGTTGCGCGAATACGTGGATATTATCGAGATAGGTACCCCTTTCGTTATATCGCAGGGGATGGCTGCCGTCCAGCGCTTTCACCAACGGTTCCCCGAGAAGGAGCTCCTCTCGGACGAAAAGATCATGGACGGAGGCTACTTCGAATCCAAGCTGGCCTTCGATGCTGGAGCCAACTACGTTACCACTCTGGGGGTGACCGATATTTTGACCGTCAAGGCTTGCCTGCGAGCCGCCGAGGAAGCTGGCCGTGATGTTGTCGTCGACATGATTTGTGTCGATGATCTCCCGACCAGAATTCGAGAGCTGGAGGACGCCGGGGTTCGACACCTCGCTGTG…
Tpi1 promoter	TTAGTTGGATTTAGTTAGAAATTAGTTGACTGGAAAAGTCACCTGGGGGTTCATTTCTGGTGTTACAAGAATGGAAGAACATTGAGATGTAGTTTAGTAGATGGAGAAGACTTGAGTTCTAAACAAAAGAGCTGAAATCATATCCTTCAGTAGTAGTATAGTCCTGTTATCACAGCATCAATTACCCCCGTCCAAGTAAGTTGATTGGGATTTTTGTTTACAGATACAGTAATATACTTGACTATTTCTTTACAGGTGACTCAGAAAGTGCATGTTGGAAATGAGCCACAGACCAAGACAAGATATGACAAAATTGCACTATTCGATGCAGAATTCGACGGTGTTTCCATTGGTGTTATGACATTCATCTGCATTCATACAAAAAAGTCTTGGTAGTGG…
Fba1 promoter	GCAACAACAGTGTACGCAGTACTATAGAGGAACAATTGCCCCGGAGAAGACGGCCAGGCCGCCTAGATGACAAATTCAACAACTCACAGCTGACTTTCTGCCATTGCCACTAGGGGGGGGCCTTTTTATATGGCCAAGCCAAGCTCTCCACGTCGGTTGGGCTGCACCCAACAATAAATGGGTAGGGTTGCACCAACAAAGGGATGGGATGGGGGGTAGAAGATACGAGGATAACGGGGCTCAATGGCACAAATAAGAACGAATACTGCCATTAAGACTCGTGATCCAGCGACTGACACCATTGCATCATCTAAGGGCCTCAAAACTACCTCGGAACTGCTGCGCTGATCTGGACACCACAGAGGTTCCGAGCACTTTAGGTTGCACCAAATGTCCCAC…
Eno2 promoter	CATGGTGCGTGGAGGCTTTGGCATCCTTTCTACTTGTAGTGGCTATAGTACTTGCAGTCCAAGCAAACATGAGTATGTGCTTGTATGTACTGAAACCCGTCTACGGTAATATTTTAGAGTGTGGAACTATGGGATGAGTGCTCATTCGATACTATGTTGTCACCCGATTTGCCGTTTGCGAGGTAAGACACATTCGGTGGTTCAGGCGGCTACTTGTATGTAGCATCCACGTTCATGTTTTGTGGATCAGATTAATGGTATGGATATGCACGGGGCGTTTCCCCGGTAACGTGTAGGCAGTCCAGTGCAACCCAGACAGCTGAGCTCTCTATAGCCGTGCGTGTGCGGTCATATCACGCTACACTTAGCTACAGAATAAAGCTCGGTAGCGCCAACAGC…
Tef1 terminator	GCTGCTTGTACCTAGTGCAACCCCAGTTTGTTAAAAATTAGTAGTCAAAAACTTCTGAGTTAGAAATTTGTGAGTGTAGTGAGATTGTAGAGTATCATGTGTGTCCGTAAGTGAAGTGTTATTGACTCTTAGTTAGTTTATCTAGTACTCGTTTAGTTGACACTGATCTAGTATTTTACGAGGCGTATGACTTTAGCCAAGTGTTGTACTTAGTCTTCTCTCCAAACATGAGAGGGCTCTGTCACTCAGTCGGCCTATGGGTGAGATGGCTTGGTGAGATCTTTCGATAGTCTCGTCAAGCCC
Tdh3 terminator	CTATCCGAAGATCAAGAGCGAAGCAAGTTGTAAGTCCAGGACATGTTTCCCGCCCACGCGAGTGATTTATAACACCTCTCTTTTTTGACACCCGCTCGCCTTGAAATTCATGTCACATAAATTATAGTCAACGACGTTTGAATAACTTGTCTTGTAGTTCGATGATGATCATATGATTACATTAATAGTAATTACTGTATTTGATATATATACTAATTACAATAGTACATATTAGAACATACAATAGTTAGTGCCGTGAAGTGGCTTAAAATACCGCGAGTCGATTACGTAATATTATAT
Pgk1 terminator	GCTATTTACAGCATGTGTAATGAGGAATATAACGTTGATTGAATTGTTTGTGAAAAATGTAGAAAATTTCAGTGAAGTTGTGTTTTCTATATAGTAAGCACTTTTGGTACAAGTATCTGCACATCCCTGCATGTTACAAGCCTGATCATGCAGGGCAATATTCTGACTATAAATATACCTCGATATTTTAGCAAGCTATAGTTGCACTAACTAACCAACTAGTATCTTCTAAATATTCCACCAATGCTTCTTCTTCTTCTCATGCAGAATCTCCTCGTACTGCTTGGTGAAGTCCACAAT
hygromycin marker gene CDS	ATGAAGAAGCCCGAACTCACCGCTACCTCTGTCGAGAAGTTCCTCATCGAGAAGTTCGACTCTGTGTCTGACCTCATGCAGCTCTCCGAGGGCGAAGAGTCCCGAGCCTTCTCTTTCGACGTGGGCGGACGAGGCTACGTGCTCCGAGTGAACTCTTGCGCCGACGGCTTCTACAAGGACCGATACGTGTACCGACACTTCGCCTCTGCCGCCCTCCCCATCCCTGAGGTGCTCGACATCGGCGAGTTCTCTGAGTCTCTCACCTACTGCATCTCTCGACGAGCCCAGGGCGTGACCCTCCAGGACCTCCCCGAGACTGAACTTCCCGCCGTGCTCCAGCCCGTGGCCGAGGCCATGGACGCTATTGCCGCCGCTGACCTCTCCCAGACCTCTGGCTTC…
leucine marker gene CDS	ATGGAACCCGAAACTAAGAAGACCAAGACTGACTCCAAGAAGATTGTTCTTCTCGGCGGCGACTTCTGTGGCCCCGAGGTGATTGCCGAGGCCGTCAAGGTGCTCAAGTCTGTTGCTGAGGCCTCCGGCACCGAGTTTGTGTTTGAGGACCGACTCATTGGAGGAGCTGCCATTGAGAAGGAGGGCGAGCCCATCACCGACGCTACTCTCGACATCTGCCGAAAGGCTGACTCTATTATGCTCGGTGCTGTCGGAGGCGCTGCCAACACCGTATGGACCACTCCCGACGGACGAACCGACGTGCGACCCGAGCAGGGTCTCCTCAAGCTGCGAAAGGACCTGAACCTGTACGCCAACCTGCGACCCTGCCAGCTGCTGTCGCCCAAGCTCGCCGATCTC…
nourseotricin marker gene CDS	ATGACCACCCTCGACGACACCGCCTACCGATACCGAACCTCTGTGCCCGGCGACGCTGAGGCTATCGAGGCCCTCGACGGCTCTTTCACCACCGACACCGTGTTCCGAGTGACCGCCACCGGCGACGGCTTCACTCTCCGAGAGGTGCCCGTGGACCCCCCCCTCACCAAGGTGTTCCCCGACGACGAGTCTGACGACGAGTCCGATGCCGGCGAGGACGGCGACCCCGACTCTCGAACCTTCGTGGCCTACGGCGACGACGGTGACCTCGCCGGCTTCGTGGTGGTGTCTTACTCTGGCTGGAACCGACGACTCACCGTCGAGGACATCGAGGTGGCCCCCGAGCATCGAGGACATGGAGTGGGCCGAGCCCTCATGGGACTCGCCACCGAGTTCGCT…
hygromycin cassette pEno2-Hph-tPgk1	GCTGCTTGTACCTAGTGCAACCCCAGTTTGTTAAAAATTAGTAGTCAAAAACTTCTGAGTTAGAAATTTGTGAGTGTAGTGAGATTGTAGAGTATCATGTGTGTCCGTAAGTGAAGTGTTATTGACTCTTAGTTAGTTTATCTAGTACTCGTTTAGTTGACACTGATCTAGTATTTTACGAGGCGTATGACTTTAGCCAAGTGTTGTACTTAGTCTTCTCTCCAAACATGAGAGGGCTCTGTCACTCAGTCGGCCTATGGGTGAGATGGCTTGGTGAGATCTTTCGATAGTCTCGTCAAGCCC
leucine cassette pTpi1-Leu-tTef3	CTATCCGAAGATCAAGAGCGAAGCAAGTTGTAAGTCCAGGACATGTTTCCCGCCCACGCGAGTGATTTATAACACCTCTCTTTTTTGACACCCGCTCGCCTTGAAATTCATGTCACATAAATTATAGTCAACGACGTTTGAATAACTTGTCTTGTAGTTCGATGATGATCATATGATTACATTAATAGTAATTACTGTATTTGATATATATACTAATTACAATAGTACATATTAGAACATACAATAGTTAGTGCCGTGAAGTGGCTTAAAATACCGCGAGTCGATTACGTAATATTATAT
nourceotricin cassette pTpi1-Nat-tTef3	GCTATTTACAGCATGTGTAATGAGGAATATAACGTTGATTGAATTGTTTGTGAAAAATGTAGAAAATTTCAGTGAAGTTGTGTTTTCTATATAGTAAGCACTTTTGGTACAAGTATCTGCACATCCCTGCATGTTACAAGCCTGATCATGCAGGGCAATATTCTGACTATAAATATACCTCGATATTTTAGCAAGCTATAGTTGCACTAACTAACCAACTAGTATCTTCTAAATATTCCACCAATGCTTCTTCTTCTTCTCATGCAGAATCTCCTCGTACTGCTTGGTGAAGTCCACAAT
ARS68	GATCCCAATATTACACCCAAGTAGCATGCATAAGCTAAAAGTAACTCGCAGCGCACACCGTGCAGATTCATAAGTCTATGATTAATTGAACGCCAATAACCCGGCTTACTACAAGTACAAGTAGGTATACATAGCGGTAATGAATCATTAGAACAAAAAAAAAAACAAAAAAAAACAAAACAAACTGTTGTGGATGCATCAACAGTAGTACATAGTTGTACAGTAGTACATAGTTGTACGATGTACTTGTACTTGTAAAAGCAAAAATGTACAATATCTCAGGGAGCGCAACTTTTACGTTCGAAGAACAATGTACCGCGTACCGCATTCTGGATTCTGCGGAACGTCTAACCTGGAAATACGATTTTTTTTTTCTTTCATTTTTTTTGCTTCTTCAAA…
FLD 5' flanking sequence	AGTACATGGTGGTATTCGTACCAGAACCTGTGAATCCATCACCCACTCACTCAATCACGAATACTATAAAACCCACTCGATATCCCCAAAGCCATTTCAAGAACATGCCTCGAAAGAAGGAACCCACAGGTAGCAATCTCAACTAACCAGCTCACGAAACCAGCTCACTCCTTAGACTCCCCGGAACCTTATCTGATGCGTTTTATTAAACGTAATAATCAACGCCTGTCGGGTTTACACCCATTGAATACAGTCTACGGCAGCTACAAGTACCGATATTGTAGTATATAATGTATCTGATGGTATCAATGTATCAATGTATCAATGTACTCCTTCTAATACGTTTACATACAATACAAATCCCCTGAAGCCCTCCACCATACACTACCAAAACTACGG…
FLD3' flanking sequence	GAGACTTAAATATTGAAGATGCATTGATTTTGACATGGCACCATAGTTCCTGTTCGAATACAAGTACTGTACTTGTAGTGTGGTGTCTTGTGTATCGTAGTATCATGGTGGTATCGTGTGCAGAAGCATGCCGTAGTCAATTGAGAGATGTTCAATTGAACAGTATTGCGACCGGCACGATCAATTGGTCTTTTCAGCTCTTCTTGCTGGGTGTAAGTACAAGTGCACGTTGGTGAGCAGAATACCAGCCTTATATGCAATGGTAGAGAAGAGCTTGGACCACCTTGGAGGTTAAACCTGTAAGCAATCTTGCAAAGAGAGTCGAGTGGGGTGGGTCTGGGAGTTGGAAAGTGGCTGAAGACAGAATTAGAAGACGGGACAATTGCTTGCTGTATATAT…
